# Supplementary material
Source: PubMed Central journal article supplement (PMC4811686)
Supplement: NIHMS762597-supplement-Supplemental_Data.pdf [file NIHMS762597-supplement-Supplemental_Data.pdf]

## **SUPPLEMENTAL MATERIAL**

### **Effects Of Arterial Stiffness On Brain Integrity In Young Adults From The Framingham Heart Study**

Pauline Maillard<sup>1,2</sup>, PhD; Gary F. Mitchell<sup>3</sup>, MD; Jayandra J. Himali<sup>4,5</sup>, PhD; Alexa Beiser<sup>4,5,6</sup>, PhD; Connie W. Tsao<sup>7</sup>, MD; Matthew P. Pase<sup>4,5,8</sup>, PhD; Claudia L. Satizabal<sup>4,5</sup>, PhD; Ramachandran S. Vasam<sup>5</sup>, MD; Sudha Seshadri<sup>4,5</sup>, MD; Charles DeCarli, MD

1 Imaging of Dementia and Aging (IDeA) Laboratory, Davis, CA

2 Department of Neurology and Center for Neurosciences, University of California, Davis, CA

3 Cardiovascular Engineering, Inc, Norwood, MA

4 The Framingham Heart Study, Framingham, MA

5 Boston University School of Medicine, Boston, MA

6 Department of Biostatistics, Boston University School of Public Health, Boston, MA

7 Cardiovascular Division, Beth Israel Deaconess Medical Center and Harvard Medical School

8 Centre for Human Psychopharmacology, Swinburne University of Technology, Hawthorn, Australia

## **Supplemental Methods**

### ***Noninvasive Hemodynamic Data Acquisition***

Participants were studied in the supine position after resting for  $\approx 5$  minutes. Supine brachial systolic and diastolic blood pressures were obtained with the use of a semiautomatic auscultatory device. Arterial tonometry with simultaneous ECG was obtained from brachial, radial, femoral, and carotid arteries with the use of a custom tonometer (Cardiovascular Engineering, Inc., Norwood, MA). All of the recordings were performed on the right side of the body. Transit distances were assessed by body surface measurements from the suprasternal notch to each pulse-recording site; a caliper was used for the femoral site. Tonometry and ECG data were digitized (1000 Hz) during the primary acquisition and transferred to the core laboratory (Cardiovascular Engineering, Inc, Norwood, MA) for analyses that were performed blinded to clinical data. Tonometry waveforms were signal averaged with the ECG R wave used as a fiducial point. Systolic and diastolic cuff BP obtained at the time of the tonometry acquisition were used to calibrate the peak and trough of the signal-averaged brachial pressure waveform. Diastolic and integrated mean brachial pressures were used to calibrate carotid pressure tracings.<sup>1</sup> Calibrated carotid pressure was used as a surrogate for central pressure.<sup>1</sup>

### ***Brain MRI analysis***

MRIs were performed on a 1.5T Siemens Avanto scanner (version syngo MR B15). Three sequences were used: a 3-dimensional T1-weighted coronal spoiled gradient-recalled echo (SPGR) acquisition, a fluid attenuated inversion recovery (FLAIR) sequence, and a diffusion tensor imaging (DTI) sequence. DTI was performed using the following parameters: repetition time (TR)=3600 ms, echo time (TE)=94 ms, 25 slices total, FOV=25 cm, acquisition matrix =  $128 \times 128$ , slice thickness = 5 mm with 5 mm gap. Diffusion weighted images were generated using 30 gradients directions with total gradient diffusion sensitivity of  $b=1000$  s/mm<sup>2</sup>, and one image with  $b=0$  s/mm<sup>2</sup>. Centralized reading of all images was performed using in-house designed imaging, visualization and analysis software (Quanta 2). The segmentation and quantification of WMH was performed using a semi-automated procedure that has been previously described<sup>2,3</sup> and which demonstrates high inter-rater reliability<sup>4</sup>. Segmentation of GM was performed on native T1-weighted images using an in-house implementation of a Bayesian maximum-likelihood expectation-maximization algorithm method<sup>5</sup>. FA maps were calculated from DTI<sup>6</sup> and linearly aligned to the corresponding T1-weighted scan, which in turn was deformed to a minimal deformation template<sup>6,7</sup> (MDT) with voxel dimensions of  $0.98 \times 1.5 \times 0.98$  mm<sup>3</sup>. This allowed transfer of GM and FA maps to the MDT space. A map of mean FA in the MDT space was created by averaging individual FA images across the population. Thresholding this mean FA map provided a binary WM mask in the MDT space. An FA threshold of 0.3 was chosen to select voxels in highly organized tracts, while minimizing inclusion of voxels with a higher degree of partial volume contamination.

Total cranial volume based on FLAIR was quantified using the Quanta 2 package of software routines according to a previously reported analysis protocol<sup>2</sup> and was used to correct for differences in head size. WMH volumes were log-transformed to normalize population variance.

### ***Threshold free cluster enhancement***

The T-maps obtained were evaluated for statistical significance using threshold free cluster enhancement (TFCE)<sup>8</sup>. In short, this methodology combines cluster size and significance

into a single parameter, the TCFE-score, by integrating the cluster size over a range of significance thresholds. A TFCE image was computed for each T map. The distribution of maximum TFCE scores under the null hypothesis was investigated for each independent variable using random permutation analysis, with 1000 iterations. Once the 95<sup>th</sup> percentile in the null distribution was found then the TFCE images were thresholded at this level to allow inference at the  $p < 0.05$  level<sup>8</sup>.

## Supplemental Tables

**Table I: Associations between decreasing fractional anisotropy and gray matter density with carotid-femoral pulse wave velocity**

| Tissue       | Region                                | Volume (cc) | Model 1                |         | Model 3                |         |
|--------------|---------------------------------------|-------------|------------------------|---------|------------------------|---------|
|              |                                       |             | Beta ( $\times 10^3$ ) | P value | Beta ( $\times 10^3$ ) | P value |
| White matter | Anterior corona radiata               | 4.13        | -0.15                  | <0.001  | -0.19                  | <0.001  |
|              | Body of corpus callosum               | 3.78        | -0.19                  | <0.001  | -0.21                  | <0.001  |
|              | Splenium of corpus callosum           | 2.77        | -0.11                  | <0.001  | -0.14                  | <0.001  |
|              | Superior corona radiata               | 2.55        | -0.13                  | <0.001  | -0.16                  | <0.001  |
|              | Genu of corpus callosum               | 2.05        | -0.15                  | <0.001  | -0.18                  | <0.001  |
|              | Posterior corona radiata              | 1.86        | -0.13                  | <0.001  | -0.15                  | <0.001  |
|              | Posterior thalamic radiation          | 1.84        | -0.15                  | <0.001  | -0.15                  | <0.001  |
|              | Posterior limb of internal capsule    | 1.74        | -0.08                  | <0.001  | -0.10                  | <0.001  |
|              | Anterior limb of internal capsule     | 1.06        | -0.09                  | <0.001  | -0.09                  | <0.001  |
|              | Cerebral peduncle                     | 0.95        | -0.09                  | <0.001  | -0.11                  | <0.001  |
|              | External capsule                      | 0.62        | -0.09                  | <0.001  | -0.09                  | <0.001  |
|              | Superior longitudinal fasciculus      | 0.60        | -0.11                  | <0.001  | -0.12                  | <0.001  |
|              | Superior fronto-occipital fasciculus  | 0.43        | -0.12                  | <0.001  | -0.11                  | 0.0028  |
|              | Fornix (cres) / Stria terminalis      | 0.30        | -0.12                  | <0.001  | -0.15                  | <0.001  |
|              | Fornix (column and body of fornix)    | 0.26        | -0.19                  | 0.0046  | -0.19                  | 0.0155  |
|              | Cingulum (cingulate gyrus)            | 0.25        | -0.11                  | <0.001  | -0.12                  | <0.001  |
|              | Sagittal stratum                      | 0.14        | -0.11                  | 0.0056  | -0.14                  | 0.0021  |
|              | Retrolicular part of internal capsule | 0.11        | -0.10                  | <0.001  | -0.11                  | <0.001  |
|              | Cingulum (hippocampus)                | 0.01        | -0.08                  | 0.0197  | -0.10                  | 0.0122  |
|              | Tapetum                               | 0.01        | -0.11                  | 0.041   | -0.15                  | 0.0172  |
| Gray matter  | Thalamus                              | 0.93        | -0.81                  | <0.001  | -0.88                  | <0.001  |

Model 1 refers to the linear regression including fractional anisotropy or gray matter density as the dependent variable and carotid-femoral pulse wave velocity as the independent variable, adjusting for age, gender, use of antihypertensive therapy, total cholesterol, current smoking status and presence of diabetes mellitus, ICV and time between clinical and MRI exams. Model 3 corresponds to Model 1 with central pulse pressure mean arterial pressure and augmentation index included as additional adjusting variables.

**Table II Interaction between Age and Hypertension with carotid-femoral pulse wave velocity on fractional anisotropy**

| Covariate                          | White matter tract                       | Volume (cc) | Beta (×103) | P value | Interaction (×103) | P value |
|------------------------------------|------------------------------------------|-------------|-------------|---------|--------------------|---------|
| Age                                | Anterior corona radiata                  | 3.44        | -0.05       | 0.062   | -0.01              | <0.001  |
|                                    | External capsule                         | 1.20        | -0.04       | 0.042   | -0.01              | <0.001  |
|                                    | Superior corona radiata                  | 0.89        | -0.05       | <0.001  | -0.01              | <0.001  |
|                                    | Superior longitudinal fasciculus         | 0.82        | 0.00        | 0.99    | -0.01              | <0.001  |
|                                    | Posterior limb of internal capsule       | 0.55        | -0.06       | 0.043   | -0.01              | <0.001  |
|                                    | Cerebral peduncle                        | 0.43        | -0.05       | 0.011   | -0.01              | <0.001  |
|                                    | Anterior limb of internal capsule        | 0.29        | -0.02       | 0.088   | -0.01              | <0.001  |
|                                    | Posterior corona radiata                 | 0.19        | -0.05       | 0.0040  | -0.01              | <0.001  |
|                                    | Superior cerebellar peduncle             | 0.19        | -0.03       | 0.018   | -0.01              | <0.001  |
|                                    | Fornix (cres) / Stria terminalis         | 0.13        | -0.07       | 0.005   | -0.01              | <0.001  |
|                                    | Fornix (column and body of fornix)       | 0.13        | -0.11       | 0.017   | -0.02              | 0.0013  |
|                                    | Retrolenticular part of internal capsule | 0.08        | -0.04       | 0.029   | -0.01              | 0.0030  |
|                                    | Inferior cerebellar peduncle             | 0.08        | -0.09       | 0.004   | -0.02              | <0.001  |
|                                    | Superior fronto-occipital fasciculus     | 0.02        | -0.06       | 0.003   | -0.01              | 0.0046  |
|                                    | Splenium of corpus callosum              | 0.01        | -0.02       | 0.19    | -0.01              | <0.001  |
|                                    | Genu of corpus callosum                  | 0.00        | 0.03        | 0.99    | -0.01              | 0.0053  |
|                                    | Posterior corona radiata                 | 0.77        | -0.07       | 0.50    | 0.29               | <0.001  |
| Antihypertensive treatment         | Superior corona radiata                  | 0.53        | -0.09       | 0.15    | 0.34               | <0.001  |
|                                    | Posterior thalamic radiation             | 0.12        | -0.07       | 0.93    | 0.33               | <0.001  |
|                                    | Retrolenticular part of internal capsule | 0.07        | -0.04       | 0.73    | 0.28               | <0.001  |
|                                    | Superior longitudinal fasciculus         | 0.04        | -0.12       | 0.63    | 0.38               | 0.0021  |
|                                    | Tapetum                                  | 0.04        | -0.04       | 0.77    | 0.26               | 0.0012  |
|                                    | Body of corpus callosum                  | 0.03        | -0.19       | 0.015   | 0.34               | 0.0073  |
|                                    | Splenium of corpus callosum              | 0.02        | -0.14       | 0.029   | 0.27               | 0.0032  |
| Posterior limb of internal capsule | 0.01                                     | -0.04       | 0.26        | 0.27    | 0.0021             |         |

Analysis refers to the linear regression including fractional anisotropy as the dependent variable and carotid-femoral pulse wave velocity (CFPWV) as the independent variable including the interaction of CFPWV with age, gender and use of antihypertensive therapy and adjusting for age, gender, use of antihypertensive therapy, total cholesterol, current smoking status and presence of diabetes mellitus, ICV and time between clinical and MRI exams.

## References

1. Kelly R, Fitchett D. Noninvasive determination of aortic input impedance and external left ventricular power output: A validation and repeatability study of a new technique. *J Am Coll Cardiol.* 1992;20:952-963
2. DeCarli C, Fletcher E, Ramey V, Harvey D, Jagust WJ. Anatomical mapping of white matter hyperintensities (wmh): Exploring the relationships between periventricular wmh, deep wmh, and total wmh burden. *Stroke.* 2005;36:50-55
3. Schwarz C, Fletcher E, DeCarli C, Carmichael O. Fully-automated white matter hyperintensity detection with anatomical prior knowledge and without flair. In: Prince J, Pham D, Myers K, eds. *Information processing in medical imaging.* Springer Berlin Heidelberg; 2009:239-251.
4. Carmichael O, Mungas D, Beckett L, Harvey D, Tomaszewski Farias S, Reed B, et al. Mri predictors of cognitive change in a diverse and carefully characterized elderly population. *Neurobiol Aging.* 2012;33:83-95
5. Fletcher E, Singh B, Harvey D, Carmichael O, DeCarli C. Adaptive image segmentation for robust measurement of longitudinal brain tissue change. *Conf Proc IEEE Eng Med Biol Soc.* 2012;2012:5319-5322
6. Lee DY, Fletcher E, Martinez O, Ortega M, Zozulya N, Kim J, et al. Regional pattern of white matter microstructural changes in normal aging, mci, and ad. *Neurology.* 2009;73:1722-1728
7. Kochunov P, Lancaster JL, Thompson P, Woods R, Mazziotta J, Hardies J, et al. Regional spatial normalization: Toward an optimal target. *J Comput Assist Tomogr.* 2001;25:805-816
8. Smith SM, Nichols TE. Threshold-free cluster enhancement: Addressing problems of smoothing, threshold dependence and localisation in cluster inference. *Neuroimage.* 2009;44:83-98
